# Supplementary material for: Economic analysis of the use of video laryngoscopy versus direct laryngoscopy in the surgical setting
Source: Atypon-hosted journal article supplement (doi:10.2217/cer-2021-0068), 2021-04-27
Supplement: supplementary material.docx [file supplementary%20material.docx]

**Supplementary Table S1. Keywords used to search for laryngoscopy type.**

| **Terms to Identify Video Laryngoscopes** | **Terms to Identify Direct Laryngoscopes** |
| --- | --- |
| INDIRECT LARYNGOSCOPY  EMERG-INDIRECT LARYNSCPY  ENT-INDIRECT LARYN W/FB RMVL  ENT-INDIRECT LARYNGOSCOPY  INDIRECT LARYNGOSCOPY NASAL  31505 INDIRECT LARYNGOSCOPY  E-INDIRECT LARYNGOSCOPY  FAC INDIRECT LARYNGOSCOP  FB REM INDIRECT LARYNGOSC  INDIRECT LARYGOSCOPY  INDIRECT LARYNG W/ REMOV  INDIRECT LARYNGOS  INDIRECT LARYNGOSCOP  INDIRECT LARYNGOSCOP31505  INDIRECT LARYNGOSCOPY W/FB REM  PROF INDIRECT LARYNGOSCOPY  VIDEO LARYNGOSCOPY BLADE  BLADE, VIDEO LARYNGOSCOPE  BLADE, VIDEO LARYNGOSCOPE  GLIDESCOPE VIDEO LARYNGOSCOPE  GLIDESCOPE VIDEO LARYNGOSCOPE  GLIDESCOPE VIDEO LARYNGOSCOPE  GLIDESCOPE VIDEO LARYNGOSCOPE  LARYNGOSCOPE VIDEO PEDI  BLADE, VIDEO LARYNGOSCOPE  BLADE, VIDEO LARYNGOSCOPE  BLD VIDEO LARYNGOSCOPE  BLADE DISP VIDEO LARYNGOSCOPE STD  HC KING VIDEO LARYNGOSCOPE CHANNELED BLA  BLADE LARYNGOSCOPE VIDEO GLIDESCOPE 3  LARYNGOSCOPE VIDEO STAT SZ 4  LARYNGOSCOPE VIDEO 3 STAT BLADE ADLT GLI  HC LARYNGOSCOPE VIDEO  VIDEO LARYNGOSCOPE BLADE  HC LARYNGOSCOPE VIDEO  LARYNGOSCOPE VIDEO TI SZ 3 29708  LARYNGOSCOPE VIDEO TI SZ 3 29708  LARYNGOSCOPE VIDEO TI SZ 3 29708  HC LARYNGOSCOPE VIDEO  LARYNGOSCOPE VIDEO GLIDESCOPE SPECTRUM LOPRO S4  LARYNGOSCOPE VIDEO GLIDESCOPE SPECTRUM LOPRO S3  LARYNGOSCOPY W VIDEO STROBOSCOPY (GLBL)  COVER BATON VIDEO LARYNGOSCOPE GLIDESCOP  LARYNGOSCOPE VIDEO 4 STAT BLADE MORBIDLY  COVER BATON VIDEO LARYNGOSCOPE GLIDESCOP  LARYNGOSCOPE VIDEO 3 STAT BLADE ADULT GL  COVER BATON VIDEO LARYNGOSCOPE GLIDESCOP  LARYNGOSCOPE VIDEO 3 STAT BLADE ADULT GL  LARYNGOSCOPE VIDEO 2 STAT BLADE GLIDESCO  82804-BLADE LARYNGOSCOPE VIDEO  BLADE, VIDEO LARYNGOSCOPE  BLADE LARYNGOSCOPE VIDEO MCGR AD  BLADE VIDEO LARYNGOSCOPE.  BLD VIDEO LARYNGOSCOPE.  VIDEO LARYNGOSCOPE AND BLADE  BLADE VIDEO LARYNGOSCOPE  BLD VIDEO LARYNGOSCOPE.  BLADE VIDEO LARYNGOSCOPE  BLADE VIDEO LARYNGOSCOPE  BLD VIDEO LARYNGOSCOPE.  LARYNGOSCOPYWVIDEOSTROBOSCOPY(GLBL)  LARYNGOSCOPE GVL2 02700429 VIDEO  BLADE VIDEO LARYNGOSCOPE  BLD VIDEO LARYNGOSCOPE.  #44499 STAT,GVL 3 GLIDESCOPE  #44501 STAT,GVL4 GLIDESCOPE  A-GLIDESCOPE GVL  AIRTRAQ LARYNG OPT REG  AIRTRAQ LARYNG OPT SM  AIRTRAQ LARYNGOSCOPE  AIRTRAQ LARYNGSCOPE  AIRTRAQ OPT LARYNGOSCOPE  AIRTRAQ OPTICAL LARYNGOSCOPE  AIRTRAQ OPTICAL LARYNNGOSCOPE  AIRWAY GLIDESCOPE #3 0574-0100  AIRWAY GLIDESCOPE #3 0574-0194  AIRWAY GLIDESCOPE #4 0270-0628  AIRWAY GLIDESCOPE #4 0574-0195  AIRWAY GLIDESCOPE 3 02700626  AIRWAY GLIDESCOPE 4 02700628  AIRWAY MCGRATH X3-003-000  AN BLADE GLIDESCOPE SZ 3  AN BLADE GLIDESCOPE SZ 4  AN GLIDESCOPE GVL 3STAT626/628  ANES GLIDESCOPE 4/5 STAT  ANES-BLADE LARYNGOSCPE MCGRATH  ANES-GLIDESCOPE DISP GVL 1 STA  ANES-GLIDESCOPE DISP GVL 2 STA  ANEST-GLIDESCOPE SZ 3&4  AirTraq Laryngoscope  BLADE PENTAX AWS LARYNGOSCOPE  BLADE 0270-0626 GLIDESCOPE SZ  BLADE 0270-0628 GLIDESCOPE SZ  BLADE 0270-0628 GLIDESCOPE SZ 4  BLADE 0270-0628 GLIDESCOPE SZ4  BLADE C-MAC #3 051113-10  BLADE C-MAC #4 061114-10  BLADE C-MAC D (10/PK)  BLADE C-MAC D 051116-10  BLADE COBALT GLIDESCOPE SM  BLADE D LARYNGSCP STRL -- DISP C-MAC  BLADE DISP GLIDESCOPE SZ 3  BLADE DISP GLIDESCOPE SZ 4  BLADE DISP GLIDESCOPE SZ PED  BLADE GLIDESCOPE  BLADE GLIDESCOPE #3  BLADE GLIDESCOPE #4  BLADE GLIDESCOPE 3 STAT  BLADE GLIDESCOPE 4 ADT  BLADE GLIDESCOPE 4 ADT (1  BLADE GLIDESCOPE 4 ADT (10/BX)  BLADE GLIDESCOPE 4 STAT  BLADE GLIDESCOPE DIPS SZ 1  BLADE GLIDESCOPE DIRECTVIEW MAC S4  BLADE GLIDESCOPE DISP LG  BLADE GLIDSP SIZE 4  BLADE GLIDESESCOPE DICOPE DISP SM  BLADE GLIDESCOPE DISP SZ 2  BLADE GLIDESCOPE DISP SZ 3  BLADE GLIDESCOPE DISPOSABLE  BLADE GLIDESCOPE DISPOSABLE LG  BLADE GLIDESCOPE DISPOSABLE SM  BLADE GLIDESCOPE GLV-3  BLADE GLIDESCOPE GLV-4  BLADE GLIDESCOPE GVL #1 STAT  BLADE GLIDESCOPE GVL 3 STAT  BLADE GLIDESCOPE GVL 3 STAT 0270-0626  BLADE GLIDESCOPE GVL 4 STAT  BLADE GLIDESCOPE GVL 4 STAT 0270-0628  BLADE GLIDESCOPE GVL-3 STAT  BLADE GLIDESCOPE GVL-4 STAT  BLADE GLIDESCOPE LARGE No0270-0384  BLADE GLIDESCOPE LOPRO S3  BLADE GLIDESCOPE LOPRO SPECTRUM S3  BLADE GLIDESCOPE LOPRO SPECTRUM S4  BLADE GLIDESCOPE LRG SZ.4 DISP 0270-0628  BLADE GLIDESCOPE SM/LG COBALT  BLADE GLIDESCOPE SMALL No0270-0383  BLADE GLIDESCOPE SPCTRM LOPRO  BLADE GLIDESCOPE SPECTRUM LO PRO S3  BLADE GLIDESCOPE SPECTRUM LO PRO S4  BLADE GLIDESCOPE SZ 0 DISP 02720-0425  BLADE GLIDESCOPE SZ 1 DISP 02720-0428  BLADE GLIDESCOPE SZ 2 DISP 0270-0429  BLADE GLIDESCOPE SZ 3 DISP 0270-0626  BLADE GLIDESCOPE TITANUIM S4 0270-0770  BLADE GLIDESCOPE VFL 3 STAT  BLADE GVL GLIDESCOPE 0270-0386  BLADE GVL GLIDESCOPE 0270-0387  BLADE GVL GLIDESCOPE 0270-0626  BLADE GVL GLIDESCOPE 0270-0628  BLADE INTUBATION MCGRATH  BLADE LARYN SZ3 MCGRATH  BLADE LARYN SZ4 MCGRATH  BLADE LARYNG 550006000 MCGRATH VIDE  BLADE LARYNG MCGRATH  BLADE LARYNG MCGRATH ADLT DISP  BLADE LARYNGO MCGRATH DISP  BLADE LARYNGOSCOPE C-MAC S  BLADE LARYNGOSCOPE GLIDESCOPE LO PRO SZ  BLADE LARYNGOSCOPE VIDEO GLIDESCOPE 3  BLADE LARYNGOSCP MCGRATH SZ 4  BLADE LARYNGSCP MCGRATH MAC SZ 3  BLADE LOPRO S1 SINGLE USE GLIDESCOPE  BLADE LOPRO S2 SINGLE USE GLIDESCOPE  BLADE LOPRO S3 SINGLE USE GLIDESCOPE  BLADE LOPRO S4 SINGLE USE GLIDESCOPE  BLADE LRNSCP 3 LOPRO GLIDESCOPE 518084  BLADE LRNSCP MCGRATH VID DISP  BLADE LRNSCP VID GLIDESCOPE LOPRO S4 TI  BLADE MCGRATH  BLADE MCGRATH DISP 550-008-000  BLADE MCGRATH DISPOSABLE  BLADE MCGRATH LARYNGEAL  BLADE MCGRATH LARYNGOSCOPE  BLADE MCGRATH MAC SIZE 3  BLADE MCGRATH MAC SIZE 4  BLADE MCGRATH MAC SZ 3 --  BLADE MCGRATH MAC SZ3 LARY DIS  BLADE MCGRATH MAC SZ4 LARY DIS  BLADE OPTICAL AIRTRAQ ATQ-011  BLADE SIZE 3 DISP GLIDESCOPE  BLADE SIZE 4 DISP GLIDESCOPE  BLADE TIT LOPRO GLIDESCOPE #3  BLADE TIT LOPRO GLIDESCOPE #4  BLADE, MCGRATH  BLADE,GLIDESCOPE LOPRO S3/S4  BLADE,SPECTRUM SU LOPRO S1/S2 GLIDESCOPE  BLADE-DISP MCGRATH 550-004-000  BLADE-DISP MCGRATH 550-006-000  BLADE-MCGRATH 350-013-000 SZ4  BLADE-MCGRATH X3-003-000  BLADEGLIDESCOPE4ADT(1  BLADEMCGRATHSZ3-4  BLADES MCGRATH SIZE 3 350-005-00  BLADES MCGRATH SIZE 4 350-013-004  BLD LARYNGSCP MCGRATH DISP LG  BLDE GLIDESCOPE GVL-4 DISP  BLDE LRYNGSC C-MAC SZ 3 29611  BLDE MCGRATH DISP 550-008-000  Blade McGrath Mac Size 4  C CS-BLADE LOPRO GLIDESCOPE SIZE 3  C CS-BLADE LOPRO GLIDESCOPE SIZE 4  C-MAC BLADE  C-MAC DISPOSABLE BLADE MAC #3  C-MAC DISPOSABLE BLADE MAC #4  C-MAC S VIDEOLARYNGOSKOPSPATEL MAC #3  ER-GLIDESCOPE GVL 3 STAT  ER-GLIDESCOPE GVL 4 STAT  GLIDESCOPE GVL 0270-0626  GLIDESCOPE GVL 0270-0628  GLIDESCOPE #3  GLIDESCOPE #4  GLIDESCOPE 2  GLIDESCOPE 3  GLIDESCOPE 3 4  GLIDESCOPE 3 COBALT  GLIDESCOPE 4 COBALT  GLIDESCOPE ADULT  GLIDESCOPE ADULT DISPOS  GLIDESCOPE BLAD SPECTRUM SU LOP  GLIDESCOPE BLADE 3 & 4  GLIDESCOPE BLADE GVL SM/LG  GLIDESCOPE BLADE LOPRO S3  GLIDESCOPE BLADE LOPRO S4  GLIDESCOPE BLADE S3 LOPRO SPECTRUM SU  GLIDESCOPE BLADES (DISP)  GLIDESCOPE BLDE GVL 1 0270-0428  GLIDESCOPE BLDE GVL 2 0270-0429  GLIDESCOPE CBLT GVL 3 STAT DSP  GLIDESCOPE COBAL GVL STRL SZ 3  GLIDESCOPE COBAL GVL STRL SZ 4  GLIDESCOPE COBAL GVL STRL SZ3  GLIDESCOPE COBAL GVL STRL SZ4  GLIDESCOPE COBALT 3  GLIDESCOPE COBALT 4  GLIDESCOPE COBALT GVL1 STAT  GLIDESCOPE COBALT GVL2 ST  GLIDESCOPE COBALT GVL2 STAT  GLIDESCOPE COBALT GVL3 ST  GLIDESCOPE COBALT GVL3 STAT  GLIDESCOPE COBALT GVL4 ST  GLIDESCOPE COBALT GVL4 STAT  GLIDESCOPE COBALT/RANGER1  GLIDESCOPE COBALT/RANGER2  GLIDESCOPE COBALT/RANGER3  GLIDESCOPE COBALT/RANGER4  GLIDESCOPE GLV 2  GLIDESCOPE GLV 2.5  GLIDESCOPE GVL 0270-0626  GLIDESCOPE GVL 0270-0628  GLIDESCOPE GVL (SZ)  GLIDESCOPE GVL 0 STAT  GLIDESCOPE GVL 0270-0626  GLIDESCOPE GVL 0270-0628  GLIDESCOPE GVL 0574-0100  GLIDESCOPE GVL 1 STAT 0270-0428  GLIDESCOPE GVL 1STAT  GLIDESCOPE GVL 2 STAT 0270-0429  GLIDESCOPE GVL 2STAT  GLIDESCOPE GVL 3  GLIDESCOPE GVL 3 DISPOSABLE  GLIDESCOPE GVL 3 SM  GLIDESCOPE GVL 3 ST 0270-0626  GLIDESCOPE GVL 3 STAT  GLIDESCOPE GVL 3 STAT 0270-0626  GLIDESCOPE GVL 3 STAT X 0270-0626  GLIDESCOPE GVL 3 STAT. 0270-0626  GLIDESCOPE GVL 3S 0270-0626  GLIDESCOPE GVL 3STAT  GLIDESCOPE GVL 4  GLIDESCOPE GVL 4 0574-0101  GLIDESCOPE GVL 4 LG  GLIDESCOPE GVL 4 STAT  GLIDESCOPE GVL 4 STAT 0270-0628  GLIDESCOPE GVL 4 STAT. 0270-0628  GLIDESCOPE GVL 4S 0270-0628  GLIDESCOPE GVL 4STAT  GLIDESCOPE GVL STAT  GLIDESCOPE GVL STAT - 3 (0270-0446)  GLIDESCOPE GVL STAT - 3 (0270-0626)  GLIDESCOPE GVL STAT - 3 [0270-0626]  GLIDESCOPE GVL STAT - 4 (0270-0444)  GLIDESCOPE GVL STAT - 4 [0270-0444]  GLIDESCOPE GVL STAT - 4 [0270-0628]  GLIDESCOPE GVL STAT3  GLIDESCOPE GVL-3  GLIDESCOPE GVL-3-STAT MM# 5812  GLIDESCOPE GVL-4  GLIDESCOPE GVL-4-STAT MM# 5819  GLIDESCOPE GVL1-2  GLIDESCOPE GVL3 STAT SIZE 3  GLIDESCOPE GVL3,4  GLIDESCOPE GVL4 STAT SIZE 4  GLIDESCOPE LO PRO S3  GLIDESCOPE LO PRO SZ 3  GLIDESCOPE LO PRO SZ 4  GLIDESCOPE LOPRO 3  GLIDESCOPE LOPRO 4  GLIDESCOPE LOPRO S2  GLIDESCOPE LOPRO S3  GLIDESCOPE LOPRO S4  GLIDESCOPE LOPRO SGL USE #4  GLIDESCOPE LOPRO TI T4  GLIDESCOPE LOPROS3  GLIDESCOPE LOPROS4  GLIDESCOPE LYRNG S4 0270-0770  GLIDESCOPE LYRNG S4 0270-0919  GLIDESCOPE MAC 54  GLIDESCOPE MAC S3  GLIDESCOPE MAC S3 0270-0771  GLIDESCOPE MAC S4 0270-0772  GLIDESCOPE PED GVL 2 27141  GLIDESCOPE PED GVL 2.5 27165  GLIDESCOPE PED GVL 3 15992  GLIDESCOPE PED GVL 4 15993  GLIDESCOPE RANGER 0 1 AND  GLIDESCOPE RANGER 3 AND 4  GLIDESCOPE RANGER 3 AND 4 DISPOSABLE  GLIDESCOPE S3 BLADE 0270-0769  GLIDESCOPE S3 BLADE 0270-0918  GLIDESCOPE SING USE 3.6KG  GLIDESCOPE SING USE 40 KG  GLIDESCOPE SPECTRUM LOPRO S3  GLIDESCOPE SPECTRUM LOPRO S4  GLIDESCOPE SPECTRUM MAC S4 31212  GLIDESCOPE STAT (GVL 2)  GLIDESCOPE STAT (GVL 3)  GLIDESCOPE STAT (GVL4)  GLIDESCOPE STAT GVL PEDI 2 --  GLIDESCOPE STAT SM GVL 3  GLIDESCOPE STAT SM GVL 4  GLIDESCOPE STAT TI LP S4 --  GLIDESCOPE SU 1.8-10KG  GLIDESCOPE SU 10KG-ADULT  GLIDESCOPE SZ 3  GLIDESCOPE SZ 3 0574-0100  GLIDESCOPE SZ 4  GLIDESCOPE TI BLADE LOPRO SZ 4  GLIDESCOPE TITANIUM BLADE LOPRO SIZE 3  GLIDESCOPE TITANIUM BLADE LOPRO SIZE 4  GLIDESCOPE VID LARY 0574-0101  GLIDESCOPE VIDEO 3 0574-0100  GLIDESCOPE VIDEO 3 474751  GLIDESCOPE VIDEO 4 0574-0101  GLIDESCOPE VIDEO LARYNGOSCOPE  GLIDESCOPE-BLADE COBALT GVL 3STAT  GLIDESCOPE-BLADE COBALT GVL 4STAT  GLIDESCOPE...1 AND 2 DI  GLIDESCOPE...AND 4 DISP  GLIDESCOPEBLADESLG  GLIDESCOPEBLADESSM  GLIDESCOPELARYNGOSCOPEBATON  GVL STAT 0 GLIDESCOPE 05740104  GVL STAT 1 GLIDESCOPE 05740026  GVL STAT 2 GLIDESCOPE 05740027  GVL STAT 3 GLIDESCOPE 05740100  GVL STAT 4 GLIDESCOPE 05740101  GVL3&4 GLIDESCOPE ANESTHESIA  Glidescope LoPro S3  Glidescope MAC S3  Glidescope MAC S4  Glidescope/Laryngoscope Blade 3,4 (P)  HB BLADE GLIDESCOPE TI LPRO ALL SZS  HB-BLADE GLIDESCOPE ANGLED LOPRO3  HB-BLADE GLIDESCOPE ANGLED LOPRO4  HB-BLADE GLIDESCOPE MAC MACS3  HB-BLADE GLIDESCOPE MAC MACS4  HB-BLADE MCGRATH DISP  HC AIRTRAQ INTUBATION VIDEO GUI  HC BLADE 0270-0628 GLIDESCOPE SZ 4  HC BLADE GLIDESCOPE DISPOSABLE  HC BLADE INTUB MCGRATH MAC SZ  HC BLADE INTUB MCGRATH MAC SZ 2 (50/BX)  HC BLADE INTUB MCGRATH MAC SZ 3 (50/BX)  HC BLADE INTUB MCGRATH MAC SZ 4 (50/BX)  HC DISP GLIDESCOPE BLADE  HC DISP GLIDESCOPE BLADE LOPRO S1-S2  HC DISP GLIDESCOPE BLADE LOPRO S3-S4  HC GLIDESCOPE #3 (0270-0626)  HC GLIDESCOPE #4 (0270-0628)  HC GLIDESCOPE BLADES GVL ALL SIZES  HC GLIDESCOPE COBALT GVL1 STAT  HC GLIDESCOPE COBALT GVL2 STAT  HC GLIDESCOPE COBALT GVL3 STAT  HC GLIDESCOPE COBALT GVL4 STAT  HC GLIDESCOPE DISPOSABLE BLADE  HC GLIDESCOPE GVL 4 STAT  HC GLIDESCOPE LARYNSOSCOPE DISPOSABLE  HC GLIDESCOPE RANGER 0 1 AND 2 DISPOSABL  HC GLIDESCOPE RANGER 3 AN  HC GLIDESCOPE RANGER 3 AND 4 DISPOSABLE  HC MCGRATH BLADE (DB5)  HC OR ANES GLIDESCOPE 3 -4  HC VID LG GLIDESCOPE LARYNG DISP STAT PA  HC VID SM GLIDESCOPE LARYNG DISP  HCGLIDESCOPECOBALTGVL1STAT  HCGLIDESCOPECOBALTGVL2STAT  HCGLIDESCOPECOBALTGVL3STAT  HCGLIDESCOPECOBALTGVL4STAT  HCHG BLD LARYNG GLIDESCOPE SZ  HCHG DISP GLIDESCOPE BLADE SIZ  HCHG GLIDESCOPE GVL-STAT SZ 1  HCHG GLIDESCOPE GVL-STAT SZ 2  HCHG HTSP GLIDESCOPE GVL 4 STA  HCHG OLOA SLV BLAD GLIDESCOPE  I-STAT GLIDESCOPE LARGE  I-STAT GLIDESCOPE SMALL  INST LARYNG VIDEO GLIDESCOPE  INST LARYNGO VIDEO GLIDESCOPE  INTUB GLIDESCOPE LOPRO VAR SIZES  LARYNG GLIDESCOPE COBALT/RANGER GVL3ST  LARYNG GLIDESCOPE COBALT/RANGER GVL4ST  LARYNG GLIDESCOPE COBALT/RANGER GVLST  LARYNG GLIDESCOPE LOPRO S  LARYNG GLIDESCOPE LOPRO S TI SPECTR  LARYNG GLIDESCOPE LOPRO S VIDEO TI SPECT  LARYNG GLIDESCOPE LOPRO S4  LARYNG GLIDESCOPE LOPRO SPECTR SU S  LARYNG. SMALL AIRTRAQ OPTICAL  LARYNGOSCOPE AIRTRAQ GREEN 42154  LARYNGOSCOPE AIRTRAQ OPT  LARYNGOSCOPE AIRTRAQ OPTICAL  LARYNGOSCOPE AIRTRAQ REG 57627  LARYNGOSCOPE BLADE S4 SU GLIDESCOPE  LARYNGOSCOPE GLIDESCOPE GVL3  LARYNGOSCOPE GLIDESCOPE GVL4  LARYNGOSCOPE GLIDESCOPE S4 29259  LARYNGOSCOPE OPTCL AIRTRAQ BLU RG  LARYNGOSCOPE OPTIC AIRTRAQ REG ATQ-011  LARYNGOSCOPE SM GLIDESCOPE DISP  LARYNGOSCOPE VID SM GLIDESCOPE  LARYNGOSCOPE VID SM GLIDESCOPE GV  LARYNGOSCOPE VIDEO GLIDESCOPE SPECTRUM LOPRO S3  LARYNGOSCOPE VIDEO GLIDESCOPE SPECTRUM LOPRO S4  LRYNGSC GLIDESCOPE SPECTRM SZ3  LRYNGSC GLIDESCOPE SPECTRM SZ4  MCGRATH DISP BLADE  MCGRATH DISP MAC BLADE  MCGRATH DISPOSEABLE BLADE  MCGRATH MAC BLADE SIZE 2  MCGRATH MAC BLADE SZ 2 350-017-000 50 EA  MCGRATH MAC BLADE SZ 3 350-005-000 50 EA  MCGRATH MAC BLADE SZ 4 350-013-000 50 EA  MCGRATH MAC BLADE SZ X3 X3-003-000 10 EA  MCGRATH MAC BLADE X-BLADE SZ X3  MCGRATH MAC DISPOSABLE BLADE SZ 2  MCGRATH MAC DISPOSABLE BLADE SZ 3  MCGRATH SINGLE USE DISPOSABLE BLADES 41103689  MCGRATH XBLADE  MCGRATHMACBLADESIZE3  MCGRATHMACBLADESIZE4  ORSC GLIDESCOPE GVL STAT 3/4  P-AIRTRAQ TUBES  RS:GLIDESCOPE BLADE GVL#4 DISP  RT-GLIDESCOPE GVL STAT  RT-GLIDESCOPEGVLSTAT  SPECTRUM GLIDESCOPE LOPRO S3  SPECTRUM GLIDESCOPE LOPRO S4  STAT BATON GVL GLIDESCOPE ALL  STAT GLIDESCOPE GVL 3 10KG AD  STAT GLIDESCOPE LARGE  STAT GLIDESCOPE SMALL  STAT GVL 4 FOR GLIDESCOPE  STAT GVT 3 FOR GLIDESCOPE  STATGLIDESCOPEGVL310KGADe | BLADE FIBEROPTIC MACINTOSH #3  BLADE LARYN MACINTOSH 3  BLADE LARYN MACINTOSH 3#860330-EHGS  BLADE LARYNGEAL MACINTOSH  BLADE LARYNGOSCOPE GLIDESCOPE MAC S3  BLADE LARYNGOSCOPE GLIDESCOPE MAC S4  BLADE LARYNSCOPE MACINTOSH #2  BLADE LARYNSCOPE MACINTOSH #3  BLADE LARYNSCOPE MACINTOSH #4  BLADE LARYNSCP MACINTOSH HI VISIBILITY 4  BLADE MAC 3 SINGLE USE GLIDESCOPE  BLADE MAC 4 SINGLE USE GLIDESCOPE  BLADE MACINTOSH CRVD #3 F  BLADE MACINTOSH CRVD #3 FIB  BLADE MACINTOSH CRVD #4 F  BLADE MACINTOSH CRVD #4 FIB  BLADE MACINTOSH CRVD#3 F  BLADE MACINTOSH DISP FIBER 2  BLADE MACINTOSH SZ4 LG ADLT  BLD LARYNGOSCOPE MACINTOSH 3  C CS-BLADE MACINTOSH DL S3  C CS-BLADE MACINTOSH DL S4  HCHG OLOA MACINTOSH 2 BLADE  MACINTOSH #3 DISPOSABLE BLADE  MACINTOSH BLADE  MACINTOSH  Direct Laryngoscope  Larynrgoscope Dir  Laryngoscopy Dir  LARYNGOSCOPYDIRECT|  LARYNGOSCOPYDIR  LARYNGOSCOPY; DIRECT  LARYNGOSCOPY,DIRECT  Direct Laryngoscopy  Laryngoscope Direct  Laryngoscopy Direct  Traditional Laryngoscopy |

**Supplementary Table S2. ICD-10 codes used to identify complications.**

| **Complication** | **ICD-10 codes** | **ICD-10 code definitions** |
| --- | --- | --- |
| Pulmonary infection | J15 | Bacterial pneumonia, not elsewhere classified |
| J18 | Pneumonia, unspecified organism |
| Cardiovascular complications | I20 | Angina pectoris |
| I21 | ST elevation (STEMI) and non-ST elevation (NSTEMI) myocardial infarction |
| I24 | Other acute ischemic heart diseases |
| I46 | Cardiac arrest |
| Respiratory complications | J98.1 | Pulmonary collapse |
| J95.89 | Other postprocedural complications and disorders of respiratory system, not elsewhere classified |
| Other surgical/medical care complications | T88.2 | Shock due to anesthesia |
| T88.3 | Malignant hyperthermia due to anesthesia |
| T88.4 | Failed or difficult intubation |
| T88.5 | Other complications of anesthesia |
| T88.8 | Other complications of surgical and medical care, not elsewhere classified |
| T88.9 | Complication of surgical and medical care, unspecified |
